# Supplementary material
Source: PubMed Central journal article supplement (PMC2583533)
Supplement: EC.00237-08_1.pdf [file EC.00237-08_1.pdf]

| Spot | Strain  | Normalised protein abundance value |              |              | Mean  | Standard error | P-value |
|------|---------|------------------------------------|--------------|--------------|-------|----------------|---------|
|      |         | Experiment 1                       | Experiment 2 | Experiment 3 |       |                |         |
| C1   | SN15    | 6.014                              | 2.709        | 5.199        | 4.641 | 0.994          | 0.044   |
|      | SNGna35 | 1.567                              | 1.421        | 2.082        | 1.69  | 0.2            |         |
| C2   | SN15    | 2.189                              | 2.354        | 3.415        | 2.653 | 0.384          | 0.023   |
|      | SNGna35 | 0.077                              | 0.14         | 0.238        | 0.152 | 0.047          |         |
| C3   | SN15    | 0.272                              | 0.716        | 0.84         | 0.609 | 0.172          | NA      |
|      | SNGna35 | 0.254                              | 0            | 0            | 0.085 | 0.085          |         |
| C4   | SN15    | 0.486                              | 0.41         | 0.224        | 0.373 | 0.078          | 0.028   |
|      | SNGna35 | 0.131                              | 0.105        | 0.083        | 0.106 | 0.014          |         |
| C5   | SN15    | 3.14                               | 4.096        | 4.074        | 3.77  | 0.315          | NA      |
|      | SNGna35 | 0.588                              | 0            | 0            | 0.196 | 0.196          |         |
| C6   | SN15    | 0.238                              | 0            | 0            | 0.079 | 0.079          | NA      |
|      | SNGna35 | 0.297                              | 0.322        | 0.445        | 0.355 | 0.046          |         |
