# Supplementary material
Source: PubMed Central journal article supplement (PMC2583533)
Supplement: EC.00237-08_2.pdf [file EC.00237-08_2.pdf]

| <b>Gene</b> | <b>Primer code</b>                  | <b>Sequences (5'-3')</b>                                             |
|-------------|-------------------------------------|----------------------------------------------------------------------|
| <i>Sch1</i> | FP1F01Fwd<br>FP1F01Rev              | CACTCAAGAGTCTTGCCCCATCC<br>ATCAGCACATCGATCTTGCCG                     |
| <i>Sch1</i> | 5'FwdXhoI-R567<br>5'RevHindIII-R567 | CTCGAGATCTACGCCTTGGTCCAGTG<br>AAGCTTTAGCTGCGGAGTCGTGATCT             |
| <i>Sch1</i> | 3'FwdPstI-R567<br>3'RevNotI-R567    | CTGCAGGAAGGGCAGATGAGTGTA<br>GCGGCCGCTACACATAAACTTAGACTTG             |
| <i>Sch1</i> | R567FwdKO<br>R567RevKO              | CCTTGGTCCAGTGGAAATCGGA<br>CGACCTCGTCATCGTATGGAAAAC                   |
| <i>Sch1</i> | Sch1GFPtransF<br>Sch1GFPtransR*     | AGCCATCGCTTTGTAGGGTC<br><u>TCGCCCTTGCTCACCATTGTAGCTGCGGAGTCGTGAT</u> |
| <i>EGFP</i> | GFP-PCRf<br>GFP-PCRr                | ATGGTGAGCAAGGGCGA<br>GAGCCCGTCACAGAAGATGATA                          |
| SNOG_01139  | ActinF<br>ActinR                    | CTGCTTTGAGATCCACAT<br>GTCACCACTTTCAACTCC                             |
| SNOG_01139  | ActinqPCRf<br>ActinqPCRr            | AGTCGAAGCGTGGTATCCT<br>ACTTGGGGTTGATGGGAG                            |
| SNOG_07541  | R563RTF<br>R563RTR                  | CAGCCTCATAACACCTAACATTGGC<br>GCTTGTAGCCGGTATGTGAGACCT                |
| SNOG_07604  | R646RTF<br>R646RTR                  | GTCTGGTTCACGGGCTTCCA<br>GAGTACTTGCCGCCGACCAA                         |
| SNOG_08275  | R800RTF<br>R800RTR                  | TATCACAAGTACATCAGC<br>GAGAGCGGTTGATGGAAGGCA                          |
| SNOG_11081  | F6B03rtF1<br>F6B03rtR1              | GGTTTCTGGGATAAGAAC<br>TTTAGCCTCAGTCTGAGC                             |
| SNOG_11441  | R806RTF<br>R806RTR                  | GATCACCTTTTCGCACATTCAGTCC<br>TTAATGCTCCAGGGTTGATCACAA                |
| SNOG_11663  | EF-1alphaF<br>EF-1alphaR            | TGTTGTCGCCGTTGAATC<br>CTCATCGTCGCCATCAAC                             |
| SNOG_13042  | R1048RTF<br>R1048RTR                | AGTGACGACGCCAATGTGGC<br>AACTGAGTTCGCGATGCGGG                         |

\*underlined sequence is a reverse complement of GFP-PCRf

---

**Comments**

---

RT-PCR

Amplification of 5' *Sch1* UTR for  
knockout vector construction

Amplification of 3' *Sch1* UTR for  
knockout vector construction

Amplification of the *Sch1* knockout  
vector

Amplification of the *Sch1* putative  
promoter site

Amplification of *eGFP* from pGPD-  
GFP

Intron spanning PCR

RT-PCR

RT-PCR

RT-PCR

RT-PCR

RT-PCR

RT-PCR

RT-PCR

RT-PCR

---
