# Supplementary material
Source: PubMed Central journal article supplement (PMC2583533)
Supplement: EC.00237-08_3.pdf [file EC.00237-08_3.pdf]

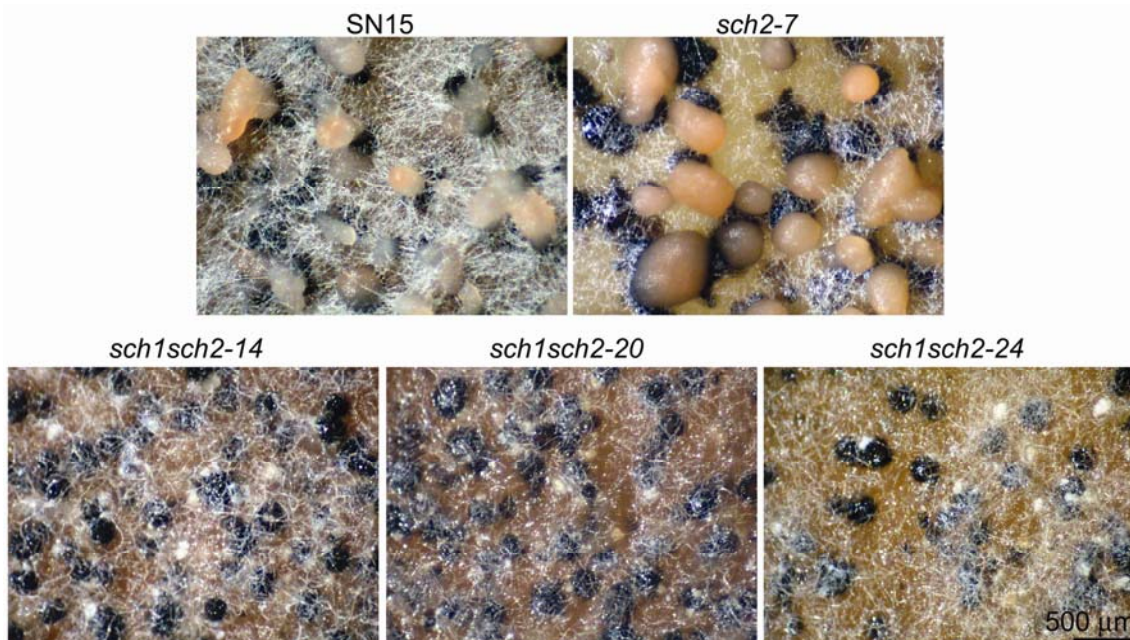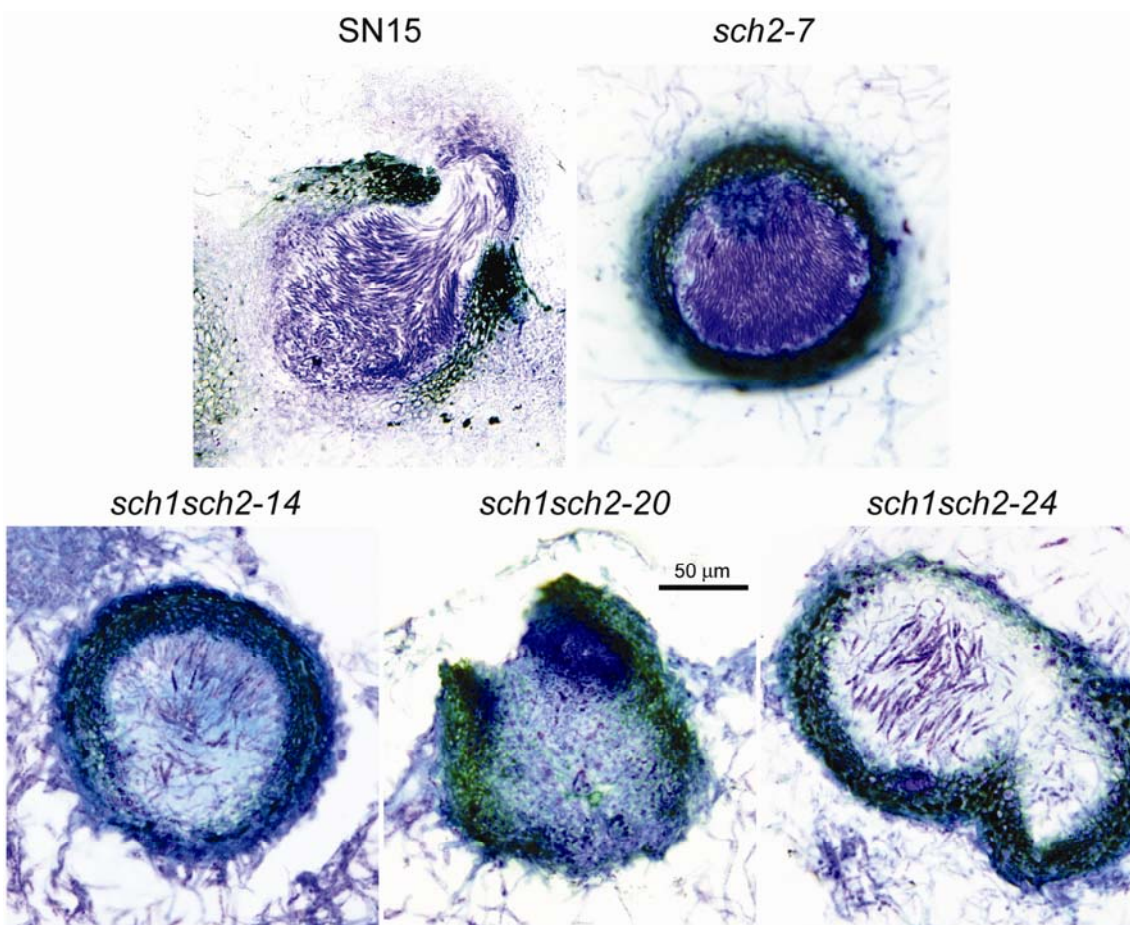

Supplementary Data 4. (A) Stereomicroscope images of pycnidia produced by SN15, *sch2-7* and 3 independently derived *sch1sch2* strains. The images of the double mutants closely match those observed with *sch1* strain (Figure 6); (B) Microscopic images of toluidine blue stained sectioned pycnidia of the SN15, *sch2-7* and 3 independently derived *sch1sch2* strains. As in observed in (A), the images of the double mutants closely correlate with the sectioned images of the *sch1* pycnidia (Figure 7).
